# Supplementary material for: Effectiveness of Hyperthermic Intraperitoneal Chemotherapy Associated with Cytoreductive Surgery in the Treatment of Advanced Ovarian Cancer: Systematic Review and Meta-Analysis
Source: MDPI journal article supplement (doi:10.3390/jpm13020258), 2023-01-30
Supplement: s1 [file s1]

Supplementary material

Table S1:Histological types of the selected studies

|                                  | Arm          | Serous<br>n(%) | Endometrioid<br>n(%) | Clear cells<br>n(%) | Mucinous<br>n(%) | Others<br>n(%) |
|----------------------------------|--------------|----------------|----------------------|---------------------|------------------|----------------|
| Cheol<br>Lim M. et<br>al. [17]   | Control      | 38(88,4)       | 2 (4,7)              | 1 (2,3)             | 0                | 2 (4,7)        |
|                                  | Experimental | 32(94,1)       | 0                    | 0                   | 0                | 2 (5,9)        |
| Van Driel<br>W.J. et al.<br>[16] | Control      | 109 (88,6)     | 1 (0,8)              | 5 (4,1)             | 2 (1,6)          | 6 (4,9)        |
|                                  | Experimental | 116 (95)       | 3 (2,5)              | 0                   | 1 (0,8)          | 2 (1,6)        |
| Ceresoli<br>M. et al.<br>[23]    | Control      | 47 (95,9)      | 0                    | 1 (2)               | 0                | 0              |
|                                  | Experimental | 25 (89,3)      | 3 (10,7)             | 0                   | 0                | 0              |
| Mendevil<br>A.A. et al.<br>[24]  | Control      | 45 (65,2)      | 5 (7,3)              | 6 (8,7)             | 3 (4,3)          | 10 (13)        |
|                                  | Experimental | 48 (69,6)      | 4 (5,8)              | 4 (5,8)             | 4 (5,8)          | 9 (14,6)       |

N: population

Figure S1: Bias Risk Analysis

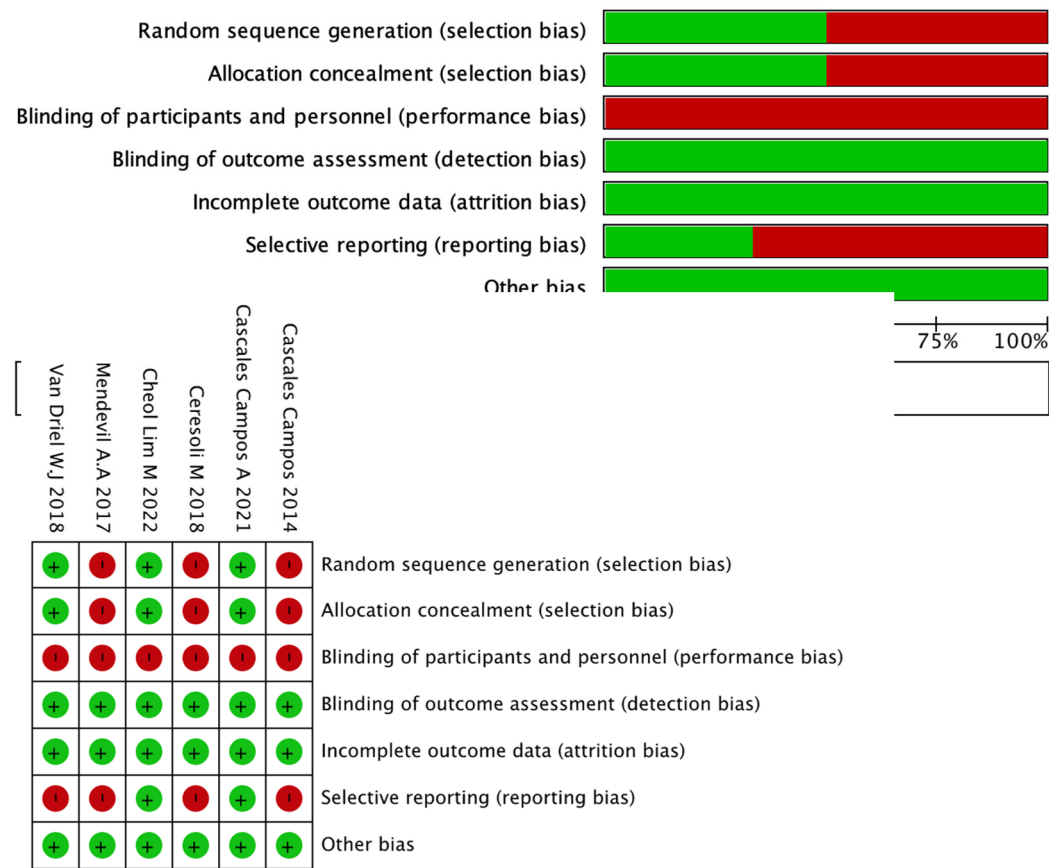

Figure S1: Bias Risk Analysis; (A) Risk of bias graph: Author's assessment of each bias presented as a percentage. (B) Summary Risk of bias: Author's assessment of each possible bias of the included studies.

Table S2. Main results of the included articles.

|                                      | Arm          | DFS<br>(Median<br>Months) | HR   | IC 95%    | <i>p</i> | OS<br>(Median<br>Months) | HR   | IC 95%     | <i>p</i> |
|--------------------------------------|--------------|---------------------------|------|-----------|----------|--------------------------|------|------------|----------|
| Cheol Lim M.<br>et al. [17]          | Control      | 15.4                      | 0.60 | 0.37–0.97 | 0.04     | 48.2                     | 0.53 | 0.29–0.96  | 0.04     |
|                                      | Experimental | 17.4                      |      |           |          | 61.8                     |      |            |          |
| Cascales<br>Campos P. et<br>al. [18] | Control      | 12                        | 0.12 | 0.02–0.89 | 0.038    | 45                       | 0.05 | 0.0031–0.8 | 0.035    |
|                                      | Experimental | 18                        |      |           |          | 52                       |      |            |          |
| Van Driel<br>W.J. et al.<br>[16]     | Control      | 10.7                      | 0.66 | 0.50–0.87 | <0.01    | 33.9                     | 0.67 | 0.48–0.94  | 0.02     |
|                                      | Experimental | 14.2                      |      |           |          | 45.7                     |      |            |          |
| Ceresoli M.<br>et al. [23]           | Control      | 13.23                     | 1.41 | 0.52–3.83 | 0.454    | 32.53                    | 0.34 | 0.12–0.99  | 0.048    |
|                                      | Experimental | 13.96                     |      |           |          | 43                       |      |            |          |
| Mendevil<br>A.A. et al.<br>[24]      | Control      | 20.0                      | 2.10 | 1.29–3.42 | <0.01    | 33.6                     | 1.22 | 0.64–2.67  | 0.95     |
|                                      | Experimental | 25.1                      |      |           |          | 33.8                     |      |            |          |
| Cascales<br>Campos P. et<br>al. [25] | Control      | 26.7                      | 0.37 | 0.21–0.68 | <0.01    | NE                       | NE   | NE         | NE       |
|                                      | Experimental | 39.1                      |      |           |          | NE                       |      |            |          |

NE, Not specified; DFS, Disease free time/disease free survival; OS, Overall survival/overall survival; HR, Hazard ratio; CI, Confidence interval; *p*, *p* value.

Table S3: Grade III-V complications in the first postoperative month.

|                                      | Arm          | Major complications<br>(grade 3-5<br>complications )during<br>first postoperative<br>month (n) (%) | Relative<br>Risk<br>(RR) | IC 95%        | P    |
|--------------------------------------|--------------|----------------------------------------------------------------------------------------------------|--------------------------|---------------|------|
| Cheol Lim<br>M. et al. [17]          | Control      | 80 (87%)                                                                                           | 1.07                     | 0.98-<br>1.18 | 0.14 |
|                                      | Experimental | 86 (93,5%)                                                                                         |                          |               |      |
| Cascales<br>Campos P.<br>et al. [18] | Control      | 10 (27,8%)                                                                                         | 1.03                     | 0.49-<br>2.16 | 0.94 |
|                                      | Experimental | 10 (28,6%)                                                                                         |                          |               |      |
| Van Driel<br>W.J. et al.<br>[16]     | Control      | 30 (25%)                                                                                           | 0.95                     | 0.61-<br>1.45 | 0.79 |
|                                      | Experimental | 32 (27%)                                                                                           |                          |               |      |
| Ceresoli M.<br>et al. [23]           | Control      | 5 (17,9%)                                                                                          | 1.40                     | 0.50-<br>3.89 | 0.52 |
|                                      | Experimental | 7 (25%)                                                                                            |                          |               |      |
| Mendevil<br>A.A. et al.<br>[24]      | Control      | NE                                                                                                 | NE                       | NE            | NE   |
|                                      | Experimental | NE                                                                                                 | NE                       | NE            | NE   |
| Cascales<br>Campos P.<br>et al. [25] | Control      | NE                                                                                                 | NE                       | NE            | NE   |
|                                      | Experimental | NE                                                                                                 | NE                       | NE            | NE   |

NE; Not especificed, n; population.
